1 **A qualitative study exploring how secondary school PE uniform policies influence body**  
2 **image, and PE engagement among adolescent girls**

3 Alice Porter<sup>1,2</sup>, Elin Cawley<sup>1,2</sup>, Laura Chapman<sup>2,3</sup>, Charlotte Crisp<sup>1,2</sup>, Ruth Wadman<sup>6</sup>, Sally  
4 Barber<sup>2,5</sup>, Ian Penton-Voak<sup>2,4</sup>, Angela Attwood<sup>2,4</sup>, Russell Jago<sup>1,2</sup>, Helen Bould<sup>2,3,7</sup>

5 <sup>1</sup>Population Health Sciences, Bristol Medical School, University of Bristol, UK

6 <sup>2</sup>NIHR Bristol Biomedical Research Centre, University Hospitals Bristol and Weston NHS  
7 Foundation Trust and University of Bristol, UK

8 <sup>3</sup>Centre for Academic Mental Health, Population Health Sciences, Bristol Medical School,  
9 University of Bristol, UK

10 <sup>4</sup>School of Psychological Science, University of Bristol, UK

11 <sup>5</sup>Born in Bradford, Bradford Institute for Health Research, UK

12 <sup>6</sup>Department of Health Sciences, University of York

13 <sup>7</sup>Gloucestershire Health and Care NHS Foundation Trust, Gloucestershire, UK

14 **Key words:** adolescents, girls, body image, physical activity, Physical Education, qualitative

15 **Correspondence to:**

16 **Alice Porter**, Population Health Sciences, Bristol Medical School, Canynge Hall, 39

17 Whatley Road, Bristol, BS8 2PS, UK

18 Alice.porter@bristol.ac.uk

19 **Contributors:** AP, LC, CC, RW, SB, IPV, AA, RJ, and HB were responsible for study  
20 conceptualisation. AP and EC were responsible for project administration. AP and EC were  
21 responsible for recruitment. AP, EC and LC were responsible for data collection. AP, EC, LC  
22 and CC were responsible for data analysis. AP wrote the first draft of the manuscript. All  
23 authors contributed to and approved the final manuscript.

24 **Funding:** This work was funded by The National Institute for Health Research, Bristol  
25 Biomedical Research Centre, grant number NIHR203315. The views and opinions expressed  
26 are those of the authors and do not necessarily reflect those of NIHR or the Department of  
27 Health and Social Care. This work is independent research supported by the National Institute  
28 for Health and Care Research Yorkshire and Humber Applied Research Collaboration. The

**NOTE:** This preprint reports new research that has not been certified by peer review and should not be used to guide clinical practice.

29 views expressed in this publication are those of the author(s) and not necessarily those of the  
30 National Institute for Health and Care Research or the Department of Health and Social Care.

## 31 **ABSTRACT**

32 **Background:** Many adolescent girls experience body dissatisfaction and have low levels of  
33 physical activity. Secondary school Physical Education (PE) offers opportunities for girls to  
34 build self-confidence and stay active; however, PE uniforms can be a barrier to participation.

35 **Objectives:** To explore how secondary school PE uniform policies influence body image and  
36 PE engagement (participation and enjoyment) among adolescent girls, and how these policies  
37 could be co-developed in future.

38 **Design:** A qualitative study involving focus groups and interviews.

39 **Participants and setting:** Forty-four 13-14-year-old girls and six PE staff members from six  
40 mixed-sex secondary schools in England.

41 **Data collection and analysis:** Using topic guides and participatory activities to aid  
42 discussions, we explored PE uniform preferences and the influence on body image and PE  
43 engagement with adolescent girls, as well as the PE uniform policy development process with  
44 PE staff. Data were analysed using reflexive thematic analysis, supported by NVivo 14.

45 **Results:** Three themes were generated. Theme 1, ‘Striking the right balance between choice,  
46 comfort and uniformity’, describes the challenges of developing PE uniform policies that  
47 offer pupils choice to maximise comfort, whilst maintaining uniformity to ensure smartness,  
48 and to reduce social comparison. Theme 2, ‘PE uniforms are “made for boys”’ reflects that  
49 current policies can often provide unisex uniforms that don’t fit the female body, or gendered  
50 options that limit girls’ choices over style and fit. Theme 3, ‘Self-confidence influences  
51 comfort in wearing PE uniform, and in turn PE engagement’ suggests girls with high self-  
52 confidence may be less concerned about others’ opinions and how they look, leading to  
53 greater PE enjoyment, whereas girls with lower self-confidence described feeling self-  
54 conscious, especially in communal changing rooms, which could impact their comfort and PE  
55 engagement.

56 **Conclusions:** Our findings suggest that developing PE uniform policies, which allow pupils  
57 to choose their own bottoms, wear additional layers, and wear PE uniform all day may  
58 improve comfort and inclusivity among girls, facilitating better PE engagement.

59 **Strengths and limitations of this study**

- 60       • Our qualitative approach, using participatory activities to prompt discussions, enabled  
61       in-depth exploration into how PE uniforms can influence body image and PE  
62       engagement among adolescent girls.
- 63       • Data from adolescent girls and PE staff were triangulated to ensure PE uniform policy  
64       recommendations considered both pupil and staff perspectives.
- 65       • Due to challenges with recruiting schools, our sample was made up of mixed-sex,  
66       mainly affluent schools in South West England only.
- 67       • We had limited representation from pupils of ethnic minority backgrounds and those  
68       with low levels of PE enjoyment.

69

70

71

72

## 73 INTRODUCTION

74 Adolescence is a critical period of vulnerability for the development of mental health  
75 problems.<sup>1 2</sup> Physical and hormonal changes during adolescence, coupled with heightened  
76 social pressures and increased social media use, can contribute to poor body image and low  
77 self-esteem.<sup>3 4</sup> Body image is defined as “the perception that individuals have of their  
78 physical self and the thoughts and feelings that result from that perception”.<sup>5</sup> Body  
79 dissatisfaction, characterized by negative thoughts and feelings regarding one's body, (often  
80 stemming from a perceived discrepancy between one's own body and an 'ideal' body),<sup>6</sup> is  
81 associated with increased risks of anxiety, depression, and the development of eating  
82 disorders, and is particularly prominent among adolescent girls.<sup>7-10</sup>

83 Physical activity has multiple benefits, including improved mental health, well-being, and  
84 self-esteem.<sup>11 12</sup> Despite these benefits, adolescence also often coincides with a reduction in  
85 physical activity.<sup>13-15</sup> Gender inequality in physical activity emerges as early as two years,  
86 with research suggesting girls engage in less outdoor play than boys.<sup>16</sup> However, this gap  
87 widens with age, as the decline in physical activity starts sooner, and becomes steeper for  
88 girls than boys from childhood into adolescence.<sup>13 14 17-19</sup> Research indicates that girls can  
89 experience multiple barriers to continuing to engage in physical activity, including low self-  
90 confidence, poor body image, gender stereotypes and norms, safety concerns, insufficient  
91 peer and family support, and discomfort with available clothing options.<sup>20 21</sup> It is therefore  
92 important to enable and promote the inclusivity of physical activity and sport for girls.

93 As part of the national curriculum for education, secondary schools offer a space for  
94 adolescent girls to engage in physical activity through Physical Education (PE), which can be  
95 an opportunity to build competency in physical and social skills, increase self-confidence,  
96 and establish long-term participation in physical activity.<sup>22</sup> However, research suggests many  
97 adolescent girls dislike PE due to the focus on competitive sport and feeling self-conscious in  
98 front of peers.<sup>23</sup> In addition, questionnaires show that many girls dislike and feel  
99 uncomfortable in their PE uniform.<sup>24-27</sup> For example, the 2024 Youth Sports Trust Active  
100 Girls survey demonstrated that only 21% of adolescent girls in England were satisfied with  
101 their PE uniform, and only 47% felt comfortable wearing it.<sup>24</sup> A retrospective study that  
102 asked women to reflect on their experiences of PE in school suggested that PE uniforms were  
103 a significant barrier to physical activity and sport engagement and, for some, negatively

104 impacted body image.<sup>28</sup> However, there is a lack of in-depth qualitative research exploring  
105 how PE uniforms may influence body image and PE engagement among adolescent girls.

106 Government guidelines in England state that schools should “choose a PE kit which is  
107 practical, comfortable, appropriate to the activity involved and affordable”.<sup>29</sup> Similar  
108 guidelines are provided in Scotland, Wales, Australia and New Zealand.<sup>30-33</sup> These guidelines  
109 advocate for gender equality within school uniform policies, however details about how this  
110 can be achieved, as well as specific recommendations for PE uniform items are not provided.  
111 There is a need to develop more practical, evidence-based recommendations for school PE  
112 uniform policies to help schools improve the inclusivity of their PE uniforms. Therefore, the  
113 aims of this study were to:

- 114 - Explore whether and how secondary school PE uniform policies influence body  
115 image and PE engagement (i.e. participation and enjoyment) among adolescent girls.
- 116 - Explore the feasibility and acceptability of co-developing new PE uniform policies  
117 with school staff and pupils.

## 118 **METHODS**

119 We conducted a qualitative study across six mixed-sex secondary schools in Bristol and  
120 South Gloucestershire, UK, via focus groups with Year 8 pupils and interviews with PE staff.  
121 Ethics approval was obtained from the Faculty of Health Sciences Ethics Committee at the  
122 University of Bristol, in February 2024 (Reference 17624) and informed written parental  
123 consent was provided for all children and informed consent for all PE staff.<sup>34</sup> The study  
124 protocol was pre-registered on the Open Science Framework (OSF) (<https://osf.io/krhg7>). We  
125 followed the Standards for Reporting Qualitative Research (SRQR) (Supplementary Table  
126 1).<sup>35</sup>

### 127 **Patient and public involvement and engagement (PPIE)**

128 We conducted PPIE with adolescent girls, their parents, and secondary school stakeholders  
129 (teacher and Health and Education lead) to inform the development of topic guides and study  
130 documents. Following PPIE feedback, some questions were removed from the pupil topic  
131 guide due to being difficult to understand or not age-appropriate and suggestions were made  
132 to add interactive elements (see Study Procedures below). Additionally, study documents  
133 were refined to improve clarity.

### 134 **Participants and recruitment**

135 We aimed to recruit 6-8 schools selected using publicly available UK government data.<sup>36</sup>  
136 Recruitment focused on achieving diversity in school type (mixed- and single-sex, local  
137 authority and academy), school performance (based on Ofsted rating; single-word judgement  
138 given to schools following inspection, and Attainment 8 score; measure of average academic  
139 performance across eight subjects), and pupil demographics (proportion of children from  
140 ethnic minority backgrounds, and free school meal eligibility (an indicator of deprivation)).  
141 Private schools were excluded.

142 The inclusion criteria for focus groups were Year 8 pupils who identified as female or non-  
143 binary. We aimed to recruit pupils with varying PE enjoyment levels and from a range of  
144 ethnic backgrounds. PE staff with knowledge of the school PE uniform policy were included  
145 for interviews. Initial recruitment purposively targeted schools in Bristol/South  
146 Gloucestershire and Bradford, UK, based on the characteristics described above, however due  
147 to low response rates (only one targeted school responded), recruitment was expanded to  
148 include all secondary schools in our recruitment areas.

#### 149 **Study Procedures**

150 A recruitment email and information sheet were sent to all schools. Staff expressing interest  
151 received a participant information sheet and were asked to disseminate study materials (study  
152 advert, participant information sheet and consent form) to eligible pupils and parents.  
153 Parental consent was obtained via an online form, which also collected demographic data on  
154 ethnicity, religion and family affluence (subjective proxy measure of income), and pupil-  
155 rated PE enjoyment level (one being low, five being high). To ensure all participants could  
156 contribute towards the discussion, we recruited a maximum of eight pupils per school. If  
157 more than eight pupils expressed interest, participants were purposively sampled based on PE  
158 enjoyment and ethnicity.

159 Six semi-structured face-to-face focus groups with pupils (without staff present) and five  
160 interviews with PE staff were conducted in schools between May and July 2024, by two  
161 female researchers (EC and AP or LC). One staff interview was conducted online via Teams  
162 by EC. Focus groups lasted between 33-49 minutes while interviews lasted between 35-45  
163 minutes, and were audio-recorded using an encrypted device with participant consent. Pupils  
164 received a £20 gift voucher and staff received a £25 voucher as reimbursement for their time.

165 Topic guides (available in the protocol: <https://osf.io/krhg7>) were used for focus groups and  
166 interviews. School PE uniform policies, obtained via school websites prior to data collection

167 were used to aid discussion, and are summarised in Supplementary Table 2. Focus group  
168 discussions covered pupils' opinions on current PE uniform policies, their influence on PE  
169 engagement and body image, and interest in changing PE uniforms. Two activities were used  
170 to facilitate discussions: writing likes/dislikes about the PE uniform on Post-it notes and  
171 attaching them to their PE uniform items, which they had brought to the session; and  
172 indicating their level of self-confidence wearing their PE uniform by sticking a t-shirt (made  
173 from paper) onto a scale ranging from self-conscious to self-confident. PE staff interviews  
174 covered views on current PE uniform policies, the policy development process, influence on  
175 pupil PE engagement and body image, and feasibility and acceptability of co-developing new  
176 policies with pupils.

### 177 **Data analysis**

178 Audio recordings were transcribed verbatim using a University-approved transcription  
179 service, and anonymised. Data included focus group and interview transcripts, and Post-it  
180 notes from pupil activities. We employed a reflexive thematic analysis (RTA)<sup>37</sup> to interpret  
181 the data, supported by NVivo 14.<sup>38</sup>

182 The analysis process involved familiarisation with the data by anonymising, reading, and re-  
183 reading transcripts. This was followed by inductive coding to identify semantic (i.e. explicit,  
184 surface-level) and latent (i.e. underlying, interpretative) patterns of shared meaning across the  
185 data. To promote reflexivity, four researchers (AP, EC, LC, CC) independently coded four  
186 transcripts on two separate occasions (eight in total), who met to discuss their codes and  
187 interpretations of the data. The remaining transcripts were coded twice by AP and EC.  
188 Coding was iterative to support the theme generation process. Initial themes were generated  
189 using the codes, then reviewed and developed. These themes were refined through regular  
190 discussions between AP and EC and subsequently reviewed and discussed with the wider  
191 research team for further refinement. Theme descriptions were produced, providing quotes  
192 from transcripts to support the themes. In addition to RTA, the data was used to outline initial  
193 recommendations and key considerations for improving PE uniform policies for adolescent  
194 girls.

### 195 **Positionality**

196 All researchers involved in coding the data were White females, highly educated to Masters  
197 or PhD level, with an interest in female health. AP, EC and LC had previous training and  
198 experience in qualitative analysis, and CC was new to qualitative analysis.

## 199 RESULTS

### 200 Sample

201 Six mixed-sex Academy schools in Bristol and South Gloucestershire were recruited, the  
202 majority of which were affluent schools. Table 1 presents the school characteristics. We had  
203 intended to recruit schools in Bradford, single-sex and local authority schools, as planned in  
204 our protocol, however were unable to due to lack of engagement from schools.

205 **Table 1. Academy\* school characteristics (N=6)**

| Characteristic                                             | Mean | Range       |
|------------------------------------------------------------|------|-------------|
| Ofsted rating**                                            | 2    | 1 - 3       |
| Percentage of pupils eligible for free school meals***     | 22   | 6.7 - 58    |
| Percentage of pupils classified as White British ethnicity | 66.5 | 42.4 - 82.2 |
| Attainment 8 score****                                     | 48   | 29.3 - 60.8 |

206 \*State-funded school that is independent from local authority

207 \*\*The Office for Standards in Education, Children's Services and Skills (Ofsted) ratings are a single-word  
208 judgement given to each education provider receiving a graded school inspection. These ratings help hold  
209 schools accountable for the education and care they provide to children. Ofsted ratings are represented as 1 -  
210 Outstanding, 2 - Good, 3 - Requires Improvement, 4 – Unsatisfactory.

211 \*\*\*Eligibility for Free School Meals is an indicator of deprivation (higher percentage representing greater  
212 deprivation). Average is 24.6% in England.<sup>36</sup>

213 \*\*\*\*A measure of pupil's average academic performance across eight subjects. Average is 48.6 for girls in  
214 England.<sup>39</sup>

215

216 Across the six schools, 58 Year 8 pupils (all female) expressed interest and 44 took part in  
217 focus groups (6-8 per school). Table 2 presents pupil characteristics, with the majority being  
218 of White ethnicity. Six PE staff (3 PE teachers, 3 Heads of PE) took part in interviews (one  
219 per school), four were female and two were male. Staff had secondary education experience  
220 ranging from seven to 29 years. A summary of the school PE uniform policies retrieved from  
221 school websites is presented in Supplementary Table 2, including discrepancies with how PE  
222 uniform policies were implemented in practice (i.e. comparing to focus group and interview  
223 data).



224 **Table 2. Characteristics of participating Year 8 pupils (N=44)**

| Characteristic                                          | n  | %  |
|---------------------------------------------------------|----|----|
| Ethnicity*                                              |    |    |
| White or White British                                  | 29 | 66 |
| Mixed or multiple ethnic group                          | 2  | 5  |
| Arab                                                    | 1  | 2  |
| Not reported                                            | 12 | 27 |
| Religion                                                |    |    |
| Christian (Catholic, Protestant or any other Christian) | 16 | 36 |
| Muslim                                                  | 2  | 5  |
| No religion                                             | 21 | 48 |
| Not reported                                            | 5  | 11 |
| PE enjoyment level (1 being low and 5 being high)       |    |    |
| 1                                                       | 1  | 2  |
| 2                                                       | 4  | 9  |
| 3                                                       | 10 | 23 |
| 4                                                       | 12 | 27 |
| 5                                                       | 17 | 39 |
| Family affluence**                                      |    |    |
| 1                                                       | 0  | 0  |
| 2                                                       | 3  | 7  |
| 3                                                       | 23 | 52 |
| 4                                                       | 11 | 25 |
| 5                                                       | 0  | 0  |

225 \*Ethnicity was self-reported and then categorised using the UK government consensus categories.<sup>40</sup>

226 \*\*Parents were asked ‘Compared to other families in the UK, would you say your family income is: 1 – Far  
 227 below average (much lower than most other families), 2 – below average (lower than most other families), 3 –  
 228 average (about the same as most other families), 4 – above average (more than most other families), 5 – far  
 229 above average (much more than most other families).<sup>41</sup>

230

## 231 **Themes**

232 Three themes were generated relating to how PE uniforms influence body image and PE  
 233 engagement (enjoyment and participation) among female adolescents. These were 1) Striking  
 234 the right balance between choice, comfort and uniformity, 2) PE uniforms are “made for  
 235 boys”, and 3) Self-confidence influences comfort in wearing PE uniform, and in turn PE  
 236 engagement.

### 237 **Theme 1: Striking the right balance between choice, comfort and uniformity**

238 Findings highlighted the challenge of providing PE uniform policies that allow pupils choice  
 239 in what they wear during PE lessons to maximise their comfort, whilst also maintaining a  
 240 certain level of uniformity which ensures: 1) pupils look smart when representing their  
 241 school; 2) the PE uniform can be worn by pupils of different gender identities (see link to  
 242 Theme 2); and 3) girls look similar to their peers and do not stand out, which could  
 243 exacerbate negative body image (see link to Theme 3).

244           *“It’s what’s functional but also what looks smart, because they have to be*  
245           *comfortable in it.” (Female PE staff, School 4)*

246   Feeling comfortable in the PE uniform was important to both Year 8 girls and PE staff.  
247   Comfort was alluded to in two ways: 1) the physical comfort of the material and fit (e.g.  
248   thickness and type of material, not being restrictive) (*“It’s kind of like quite thick [the PE top*  
249   *material], so I normally wear like a thinner top and shorter type shorts because it’s just more*  
250   *comfortable.” Pupil, School 6*); and 2) psychological comfort (*“Because people might feel*  
251   *better in something slim fit than they do baggy because they like feel confident about their*  
252   *self and their body” Pupil, School 1*). It appeared that comfort was strongly influenced by  
253   level of choice, with a preference among the girls to *“be able to wear whatever we feel*  
254   *comfortable in” (Pupil, School 2)*. Allowing choice, particularly over the style, fit and length  
255   of bottoms (e.g. leggings, shorts, joggers), and to wear additional layers (e.g. jackets, coats,  
256   underlayers) seemed to facilitate greater comfort.

257           *“‘cause we have such a good like amount of choice, I think it's easier to wear*  
258           *something you're more comfortable in one day if you don't really wanna wear*  
259           *something like that.” (Pupil, School 4)*

260   Looking good and being “on trend” also appeared to matter to some pupils, alongside  
261   comfort. Many girls wanted the option to wear cycle shorts, although some PE staff felt these  
262   choices were influenced more by fashion and social media, than comfort and practicality.  
263   Whilst pupils valued having options for better comfort, some seemed to worry about standing  
264   out and being picked on for it, especially when choosing the type of bottoms to wear and  
265   choosing colours (e.g. for trainers), as well as when having to wear spare uniform (if uniform  
266   was forgotten). It was noted by some pupils and PE staff that trends were set by the  
267   *“popular” or “sporty” girls*, which other girls may feel pressure to follow, even if they are  
268   less comfortable options (see links to Theme 3).

269           *“if you decide to wear something that not everyone wears but it’s still within uniform*  
270           *restriction, a lot of people tend to say something about it and then even if that thing is*  
271           *meant to be positive or meant to be a joke, it still can make people feel insecure.”*  
272           *(Pupil, School 2)*

273           *“say there was a skort, I feel like some people would wear the skort and then I’d feel*  
274           *bad for people who wear shorts because just knowing school in general. I feel like the*

275 *popular ones would wear like skorts or something and then people would find it weird*  
276 *if you wore shorts” (Pupil, School 6)*

277 *“I think social media has such a negative impact on what they deem as acceptable,*  
278 *you could literally go on Instagram now and type in sport, and there'd be girls*  
279 *walking around in next to nothing, sports bras and shorts.” (Female PE Staff, School*  
280 *5)*

281 Pupils expressed that when their PE uniform was uncomfortable and ill-fitting, this could  
282 restrict their movement, reducing their level of participation in PE lessons. Additionally,  
283 some pupils described feeling either too cold (in winter) or too hot (in summer) in their  
284 uniform, which could also reduce level of exertion and participation. Some PE staff described  
285 adapting the PE uniform policy in these circumstances to try to enhance pupil comfort.

286 *“The shorts are like ridiculously thick. Like I can barely breathe in these.” (Pupil,*  
287 *School 2)*

288 *“the shorts sometimes like go up and it like distracts you into making sure your shorts*  
289 *don't go up all the time. Because we have to like pull them down if they're like getting*  
290 *really short.” (Pupil, School 6)*

291 *“...in winter if we're outside and it's really cold they can wear a coat. They can bring*  
292 *gloves, they can wear a hat if they want to. I just want them to be comfortable. I want*  
293 *them to take part and that helps, definitely helps.” (Male PE staff, School 1)*

294 Although most PE staff appeared to value pupil choice and comfort, some also highlighted  
295 the importance of uniformity, with varying approaches to achieving this for PE uniforms  
296 across schools. Some schools offered unisex items (e.g. tops, shorts) to all pupils, to promote  
297 smartness and cater for diverse gender identities (see links to Theme 2). Other schools  
298 mandated school-branded items or plain, non-branded items to reduce social comparison  
299 between pupils.

300 *“They were just unisex shorts and I think it's all there and it's easier kit wise and*  
301 *actually when they go to fixtures and different things they look quite smart. It's not a*  
302 *scruffy kind of PE kit” (Female PE staff, School 6)*

303           “...more students maybe in terms of gender and we just want to make everyone feel  
304           comfortable that they didn't have to pick one or the other.” (Female PE staff, School  
305           2)

306           “the uniform is in place so that no one feels uncomfortable in terms of brands they've  
307           got and stuff, whereas if we're saying you can bring any jacket in, it's going to be a  
308           brand war of what they're allowed.” (Female PE staff, School 4)

## 309   **Theme 2: PE uniforms are “made for boys”**

310   Schools in our sample varied in whether they provided a universal, unisex or gender-based  
311   PE uniform. It appeared that many of the schools that provided a universal, unisex PE  
312   uniform (e.g. top and shorts) did this to ensure it fitted pupils of all gender identities, which  
313   was valued by some pupils.

314           “you just have it all that it fits boys, it fits girls and if you're non-binary you can  
315           choose what you wear and it's not like, ‘Oh you're wearing a boys PE kit.’” (Pupil,  
316           School 3)

317           “there's two different types of joggers which are both unisex, the shorts are unisex,  
318           the t-shirts are unisex. So there's no boys' kit, girls' kit, it's just, ‘There's our kit, pick  
319           and choose what you want to wear.’ Again, you've got so many kids at the moment  
320           that are gender fluid, or transitioning, or doing what they want, so you don't want to  
321           be like, ‘This is the girls, that's the boys.’” (Female PE staff, School 5)

322   However, many girls and some PE staff expressed that unisex clothing often did not suit or fit  
323   female body shapes because it is “made for boys”, with unisex items being described as  
324   “baggy”, “elongated”, and “not very flattering”. When given choice, girls often opted for  
325   their own bottoms over the unisex options advertised on the school website. When unisex  
326   bottoms were compulsory, girls described needing to “roll” the shorts for a better fit (i.e.  
327   adjust the waistband). Some girls expressed that they disliked “matching with the boys”  
328   (Pupil, School 1), and wanted “some options for girls” (Pupil, School 6).

329           “they're not very flattering at all and they don't fit me very well or they don't fit a lot  
330           of the girls that I know, very well. I feel like the shorts are made more for the boys  
331           than they are for the girls.” (Pupil, School 2)

332           *“lots of the girls won't wear the shorts that we've got, because I don't think they're*  
333           *very flattering.” (Female PE staff, School 5)*

334           *“Everyone just rolls them anyway... I wear shorts underneath but say you didn't wear*  
335           *shorts underneath, if you don't roll them, I feel like if you sit down you're just going*  
336           *to flash everyone.” (Pupils, School 6)*

337 In schools with gender-based PE uniforms, items were typically advertised on uniform  
338 websites separately for boys and girls, despite some items being unisex. PE staff often  
339 described that their policy allowed pupils to choose any items. For example, the female PE  
340 staff in School 2 expressed *“if anyone wants to wear one or other kits, we're absolutely fine*  
341 *with that”*. In contrast, girls often felt that the PE uniform rules meant that they were *“not*  
342 *allowed”* to wear items labelled for boys. Girls appeared to associate certain “boys” items  
343 (e.g. rugby tops) with particular sports, which they did not participate in and so felt they  
344 couldn't wear. Despite some girls feeling that “boys” items would be more practical, they  
345 described feeling self-conscious wearing something labelled for boys because it would be  
346 against the norm (see links to Theme 1 and 3). For example, a pupil in School 2 expressed *“I*  
347 *don't think some girls would be comfortable wearing the boys uniform... It's just the name,*  
348 *knowing it's boys uniform.”* Instead of unisex or gender-based uniforms, it was suggested by  
349 pupils that *“people would like having options on what fit to wear” (Pupil, School 1).*

350           *“Participant: there's only joggers for boys. There's none for the girls... Interviewer:*  
351           *You can't wear joggers? Participant: We can but it's only on the boys' website. So if*  
352           *you go onto the uniform website there's a boys' section and girls' section. In the boys'*  
353           *section there's joggers. In the girls' section there's just like skort and leggings.”*  
354           *(Pupils, School 3)*

355           *“And they mostly do rugby all the time and their rugby t-shirts are normal gym tops...*  
356           *We don't do rugby but the boys do rugby.” (Pupils, School 1)*

357           *“certainly the girls don't want to wear the rugby top at all” (Male PE staff, School 1)*

### 358 **Theme 3: Self-confidence influences comfort in wearing PE uniform, and in turn PE** 359 **engagement**

360 PE staff suggested that low self-confidence (i.e. lack of belief in oneself and one's abilities)  
361 and negative body image were common issues among pupils, which became more noticeable  
362 with age. The Year 8 girls articulated varying levels of self-confidence and psychological

363 comfort in their PE uniforms. Some girls expressed feeling self-conscious in their PE  
364 uniform, which led them to worry about how their appearance and ability would be perceived  
365 by others. In contrast, other girls were unconcerned with how they looked, allowing them to  
366 enjoy PE.

367 *“you see other people and they look better in their P.E. kit than you do... even if*  
368 *you’re like good at sports and you enjoy sports and stuff, it’s just the P.E. kit makes*  
369 *you feel like they can do it better than you or something.” (Pupil, School 6)*

370 *“I’ve never really thought about how I looked in the PE kit ‘cause I’ve always*  
371 *thought about the actual PE... I personally like the skort and t-shirt and as long as*  
372 *I’m okay with it I just don’t really care if other people look or if other people feel*  
373 *badly about it because I’m the one that’s wearing it.” (Pupil, School 2)*

374 *“I just feel fine in my PE kit and it’s really comfy and I don’t feel like anybody’s*  
375 *looking at me.” (Pupil, School 4)*

376 Psychological comfort in wearing the PE uniform appeared to be influenced by body image  
377 concerns, judgement from others, and communal changing rooms, as illustrated by the quotes  
378 presented in Table 3. Some girls felt self-conscious in PE lessons due to concerns about their  
379 body hair and body size, leading them to want to cover up. It was suggested by pupils that  
380 many girls would avoid maximum exertion during PE because the PE uniform was  
381 uncomfortable when sweaty, but PE staff suggested this could be because getting sweaty  
382 would “*spoil*” their appearance (e.g. make-up and hair). PE staff suggested girls with lower  
383 sporting abilities were more appearance-conscious and less likely to engage in PE, unlike  
384 girls who enjoyed PE and felt confident in their ability. Fear of judgement about their  
385 appearance appeared to be a key concern for some girls, often heightened by negative  
386 comments, particularly from boys, which led some PE staff to keep boys and girls separate  
387 during PE. Self-consciousness appeared to be particularly exacerbated in communal changing  
388 rooms for some girls, with PE staff discretely allowing these pupils to change in other private  
389 places. In schools that allowed pupils to stay in their PE uniform all day, PE staff felt the  
390 policy had made a positive impact by eliminating the discomfort of changing in front of  
391 others.

392 **Table 3. Factors influencing girls’ psychological comfort in wearing PE uniform and associated quotes linked to Theme 3 (Self-**  
 393 **confidence influences comfort wearing PE uniform, and in turn PE engagement)**

| <b>Factors influencing psychological comfort in PE uniform</b> | <b>Associated quotes</b>                                                                                                                                                                                                                                                                                                                                                                                                                                                                                                                                                                                                                                                                                                                                                                               |
|----------------------------------------------------------------|--------------------------------------------------------------------------------------------------------------------------------------------------------------------------------------------------------------------------------------------------------------------------------------------------------------------------------------------------------------------------------------------------------------------------------------------------------------------------------------------------------------------------------------------------------------------------------------------------------------------------------------------------------------------------------------------------------------------------------------------------------------------------------------------------------|
| Body image concerns, including body hair and body size         | <p><i>“in the summer I’m just like really insecure about my body, like my body hair. So in the summer when it’s boiling hot I don’t really wanna wear a really short skirt because I’m not really secure with that.” (Pupil, School 3)</i></p> <p><i>“if you don’t think you look good it’s not really good for your self-confidence... for me like my shorts are really tight and everyone else’s is really baggy so like it just makes me feel like, oh my thighs are thicker than hers and that like doesn’t make me feel very good about myself.” (Pupil, School 6)</i></p>                                                                                                                                                                                                                        |
| Sweatiness, appearance, and sporting ability                   | <p><i>“I feel if you have the collar it makes you sweat more as well and then people feel more uncomfortable in their PE kits and then they’re less active to do PE.” (Pupil, School 1)</i></p> <p><i>“lower sets girls who are less able within PE, are more conscious of their appearance as well, and trying to get them to do PE is very difficult. Trying to get them to push themselves, to try and get them to get out of breath, because they don’t want to spoil their makeup, they don’t want to get sweat in their hair.” (Female PE Staff, School 4)</i></p> <p><i>“I feel confident in a lot of things I wear, I don’t really mind what I look like and then because I enjoy P.E. as well so as long as I enjoy it I don’t really mind what I look like in it.” (Pupil, School 6)</i></p> |

|                                |                                                                                                                                                                                                                                                                                                                                                                                                                                                                                                                                                                                                        |
|--------------------------------|--------------------------------------------------------------------------------------------------------------------------------------------------------------------------------------------------------------------------------------------------------------------------------------------------------------------------------------------------------------------------------------------------------------------------------------------------------------------------------------------------------------------------------------------------------------------------------------------------------|
| <p>Fear of judgement</p>       | <p><i>“I feel like the PE kit itself is like, okay and I think a lot of people would be confident and wouldn't really care if it wasn't for the comments that other people make... if people are making comments and rude stuff like, I think it just lowers your confidence and you're just not gonna like it [the PE uniform] yourself.” (Pupil, School 4)</i></p> <p><i>“we have to think about where the boys groups and girls groups are going to be because a lot of the girls are reluctant to sprint as hard as they can down the straight if the boys are near.” (PE staff, School 1)</i></p> |
| <p>Communal changing rooms</p> | <p><i>“I don't like changing clothes and like the changing room. I find that uncomfortable.” (Pupil, School 6)</i></p> <p><i>“They do not like changing in the changing rooms in front of other people, which is fine if they don't. They can go to the toilets.” (Female PE staff, School 2)</i></p> <p><i>“For me it's a much better system [referring to the all-day PE uniform policy] for many reasons. It's far more inclusive. You don't have issues with changing rooms and students who maybe don't feel so comfortable.” (Male PE staff, School 3)</i></p>                                   |



### 395 **Co-developing PE uniform policies in secondary schools and ideas for recommendations**

396 PE staff agreed that evidence-based, national-level guidance on school PE uniform policies  
397 would be valuable, providing guidelines are broad and adaptable, to account for varying  
398 school contexts and approaches.

399 *“I think if there was a generic policy that supported schools who might need some*  
400 *guidelines, then it's gonna be a benefit isn't it” (Female PE staff, School 4)*

401 Pupils and PE staff across the six schools discussed ways to improve PE uniforms, which we  
402 have developed into initial recommendations for secondary schools to consider when  
403 reviewing and developing their PE uniform policies. Table 4 presents these initial  
404 recommendations by uniform item (tops, bottoms, additional layers, sports bras, and  
405 trainers/footwear), considering options, colour, style and fit, length, branding, and material,  
406 as well as, sizing, spare uniform, and affordability. Supplementary Table 3 presents these  
407 recommendations alongside supporting qualitative evidence.

408 As highlighted in Theme 3, discomfort in communal changing rooms appeared to be an issue  
409 for many girls. Some PE staff also noted that *“girls can take ages to get changed” (Female*  
410 *PE staff, School 5)*, which reduced active time during PE lessons (as changing both in and out  
411 of PE uniform must happen during PE lessons). Some schools allowed pupils to wear their  
412 PE uniform all day (on PE lesson days) or come into or leave school in their PE uniform,  
413 reducing the need to change. This approach appeared to alleviate these issues, and the  
414 benefits and considerations discussed for adopting this policy are summarised in  
415 Supplementary Table 4.

416 Pupils emphasised the importance of being involved in updating PE uniform policies, noting  
417 *“we're the ones wearing it, not them so they don't know how it feels” (Pupil, School 2)*. The  
418 PE staff agreed, with some describing previous ways of involving pupils, such as using  
419 school-wide voting systems and surveys. However, some staff preferred to involve a smaller  
420 *“select group”*, as involving all pupils could *“open up possible floodgates of like ‘We want*  
421 *this. We want that’” (Male PE staff, School 3)*. Additionally, PE staff discussed the  
422 involvement of other stakeholders, including parents, Senior Leadership Teams (SLT),  
423 uniform designers and distributors, and for some schools, governors. While some PE staff felt  
424 SLT were *“supportive”* of them making PE uniform changes, others felt they had limited  
425 influence in changing current policies. Supplementary Table 5 presents a summary of the

426 data, outlining stakeholder involvement in the PE uniform development process across  
427 schools.

428 PE staff highlighted that uniform policy changes would require at least one academic year to  
429 coordinate with uniform distributors, and gain school management approval. Both pupils and  
430 PE staff suggested implementing changes at the start of the academic year, introducing new  
431 mandatory PE items for Year 7 pupils only to minimise costs for older pupils.

432 *“it would be almost like a year long process... the new year 7s coming in would have*  
433 *the new kit and then it would be open for the rest of the year groups to purchase if*  
434 *they wanted it. Rather than saying everyone’s got to have the new kit now. So just*  
435 *gradually include it into the policy.” (Male PE staff, School 1)*

436 **Table 4. Initial recommendations for secondary school PE uniform policies**

| <b>PE uniform policy category</b> | <b>Initial recommendations</b>                                                                                                                                                                                                                                                                                                                                                                                                                                                                                                                                                                                                                                                                                                                                                                                                                  |
|-----------------------------------|-------------------------------------------------------------------------------------------------------------------------------------------------------------------------------------------------------------------------------------------------------------------------------------------------------------------------------------------------------------------------------------------------------------------------------------------------------------------------------------------------------------------------------------------------------------------------------------------------------------------------------------------------------------------------------------------------------------------------------------------------------------------------------------------------------------------------------------------------|
| Top                               | <ul style="list-style-type: none"> <li>• The PE top should be the only mandatory PE uniform item and include a small school logo.</li> <li>• Choose a neutral colour that is durable and can accommodate change in weather and temperature. Schools may wish to incorporate the school colour(s).</li> <li>• Choose a well-fitting, round neck t-shirt without a collar.</li> <li>• Choose durable, breathable, activewear material, avoiding mesh fabric (closely spaced holes) and too many seams.</li> <li>• Choose a top that is comfortable and practical for physical activity rather than formal.</li> <li>• Provide fitted and baggy options, alongside a regular unisex top for pupils to choose from, ensuring options are not labelled based on gender.</li> </ul>                                                                   |
| Bottoms                           | <ul style="list-style-type: none"> <li>• School-branded bottoms should not be mandatory.</li> <li>• Provide pupils with a choice, including for example, shorts, leggings, and tracksuit bottoms/joggers. Preferably allow pupils to wear their own bottoms. This will enable optimal comfort, style and fit.</li> <li>• Consider providing rules or recommendations to pupils and parents about appropriate branding. Schools may wish to not allow branded items (e.g. Nike).</li> <li>• Remove the option of skorts. Consider offering cycling shorts, but ensuring rules on appropriate length is mandated.</li> <li>• Allow plain black bottoms, which is the easiest colour to find.</li> <li>• Consider providing rules or recommendations to pupils and parents about appropriate activewear material for physical activity.</li> </ul> |
| Additional layers                 | <ul style="list-style-type: none"> <li>• Allow all pupils the option to wear underlayers/skins to cover their skin. Schools may wish to provide rules or guidance on appropriate colours, and branding.</li> </ul>                                                                                                                                                                                                                                                                                                                                                                                                                                                                                                                                                                                                                              |

|                                    |                                                                                                                                                                                                                                                                                                                                                                                                                                                                                                                                                                                                                                                          |
|------------------------------------|----------------------------------------------------------------------------------------------------------------------------------------------------------------------------------------------------------------------------------------------------------------------------------------------------------------------------------------------------------------------------------------------------------------------------------------------------------------------------------------------------------------------------------------------------------------------------------------------------------------------------------------------------------|
|                                    | <ul style="list-style-type: none"> <li>• Consider allowing pupils to wear their own jackets and coats. Schools may wish to provide rules or guidance on appropriate colours, styles, and branding.</li> <li>• Consider offering optional school branded hoodies or for pupils to wear their own hoodies for outdoor activities.</li> <li>• Allow pupils to wear additional layers and religious clothing for religious reasons. Schools may also wish to provide rules or guidance on appropriate colours.</li> </ul>                                                                                                                                    |
| Sports bras                        | <ul style="list-style-type: none"> <li>• Wearing a sports bra should be personal choice. Consider providing guidance on the importance of, and when pupils may need to start wearing, sports bras.</li> </ul>                                                                                                                                                                                                                                                                                                                                                                                                                                            |
| Trainers and footwear              | <ul style="list-style-type: none"> <li>• Provide guidance on appropriate styles and colours.</li> <li>• Consider limiting the need for additional mandatory footwear, which is not regularly required during PE lessons (e.g. football boots) to reduce cost to parents.</li> </ul>                                                                                                                                                                                                                                                                                                                                                                      |
| Sizing                             | <ul style="list-style-type: none"> <li>• Offer a large range of sizes for school branded items, and consider offering various styles (e.g. regular, fitted, baggy) to enable optimal comfort.</li> </ul>                                                                                                                                                                                                                                                                                                                                                                                                                                                 |
| Spare uniform                      | <ul style="list-style-type: none"> <li>• If possible, offer spare uniform that looks similar to the PE uniform, and ensure it is washed regularly.</li> </ul>                                                                                                                                                                                                                                                                                                                                                                                                                                                                                            |
| Cost and affordability for parents | <ul style="list-style-type: none"> <li>• Limit mandatory school branded items to the PE top only.</li> <li>• Make it clear to pupils and parents from Year 7 which items are mandatory and must be school-branded, and which items pupils have the choice to wear their own clothing.</li> <li>• Consider limiting branding allowed on own clothing to reduce cost, and pressure to buy ‘trendy’ items.</li> <li>• Choose durable materials so uniform will not need to be replaced regularly.</li> <li>• Consider collecting second-hand uniform from leavers and offering pre-loved items at a reduced price to support low-income parents.</li> </ul> |

437

## 438 **DISCUSSION**

439 This qualitative study with Year 8 pupils and PE staff highlighted how PE uniforms can  
440 influence body image, and PE engagement among adolescent girls, and explored how PE  
441 uniform policies could be changed and co-developed to improve comfort for girls.

442 Our findings highlighted that PE uniforms that fit poorly, are too short, restrictive, and not  
443 weather appropriate (e.g. short skorts, tight collars, thin jackets) can discourage PE  
444 participation. These findings align with questionnaire-based research showing dissatisfaction  
445 among 14-16-year-old girls with PE uniform length and warmth,<sup>25</sup> with 20% reporting PE  
446 uniform as a barrier to PE participation.<sup>24</sup> Although limited and mixed, there is some  
447 quantitative evidence suggesting activity-enabling uniforms may improve physical activity  
448 levels. Using an ecological study design, comparing school-aged children's physical activity  
449 levels across 135 countries/regions, Ryan et al., (2024)<sup>42</sup> found that while school uniforms  
450 had no overall association with activity levels globally, they were associated with greater  
451 female gender inequalities in high-income countries (including the UK). Experimental studies  
452 in Australia comparing active versus traditional school uniforms in primary schools,  
453 collecting device-measured physical activity, found mixed results. One study reported  
454 increased activity for girls during break time<sup>43</sup> and the other found minimal effects.<sup>44</sup> Further  
455 research is required to determine whether redesigning secondary school PE uniforms can  
456 improve girls' PE engagement and activity levels.

457 Our findings suggested that PE engagement among girls can be negatively impacted by  
458 uniforms that do not promote psychological comfort. When uniforms fit poorly (e.g. unisex  
459 designs) or expose too much skin, this can heighten feelings of self-consciousness, and  
460 amplify body image insecurities, such as body hair, and shape, as can changing in communal  
461 changing rooms. This appears to particularly impact girls with low self-confidence,  
462 potentially reducing their motivation and participation in PE, which can in turn further  
463 exacerbate poor body image. In contrast, self-confident girls appear less affected by PE  
464 uniforms. Our findings align with previous qualitative research with female adolescent  
465 athletes, which identified poor body image and inappropriate sportswear as major barriers to  
466 participation.<sup>45</sup> In addition, a survey of 12-18-year-olds in Australia showed that more active  
467 girls were 20% more likely to report higher body satisfaction and greater willingness to wear  
468 any uniform.<sup>26</sup> In our sample, 66% of Year 8 girls reported high levels of enjoyment in PE.  
469 However, a lack of self-confidence may be a more significant issue among girls with lower

470 PE enjoyment and among older girls, as evidence indicates that body dissatisfaction tends to  
471 be higher among older and less active adolescents.<sup>10 46</sup> Furthermore, previous research  
472 highlights the links between self-confidence and self-esteem, and body dissatisfaction. For  
473 example, one study found that young females with lower self-esteem experienced greater  
474 body dissatisfaction when wearing tight, revealing sportswear compared to comfier baggy  
475 sportswear.<sup>47</sup> Designing PE uniforms that promote self-confidence, particularly for girls who  
476 struggle with it, could play a key role in ensuring PE is enjoyable and inclusive for all girls.

477 Evidence suggests that image-based social media (e.g. Instagram, Tik Tok) is associated with  
478 body dissatisfaction and low self-esteem among adolescent girls as it may encourage social  
479 comparison and unattainable female body ideals.<sup>4 48</sup> This can negatively impact mental well-  
480 being and potentially contribute to disordered eating.<sup>49-52</sup> Our findings suggested that female  
481 activewear fashion trends may influence girls' clothing choices when allowed to wear their  
482 own clothes for PE. Striking the right balance between offering choice to promote  
483 psychological comfort, whilst minimising the focus on appearance and social comparison  
484 may be important for fostering self-confidence and enhancing PE engagement among girls.  
485 Although research on how adolescent girls access and perceive online physical activity  
486 content is limited, one qualitative study suggested that engaging with fitness content can lead  
487 to setting unattainable body goals and body dissatisfaction among young adults.<sup>53</sup> In addition,  
488 an experimental study found that browsing for activewear online lowered self-esteem,  
489 reduced positive body image, and heightened appearance comparison tendencies among  
490 women.<sup>54</sup>

#### 491 **Implications for policy and future research**

492 Governments advocate for gender-inclusive school and sports uniforms;<sup>29-33</sup> however they  
493 lack specific recommendations for secondary schools in England. Our data suggests that  
494 recommendations should include offering a range of appropriate options for bottoms (e.g.  
495 shorts, leggings, joggers), providing various fits and styles without gender labels, allowing  
496 additional layers, and permitting pupils to wear PE uniform throughout the day on PE lesson  
497 days. These recommendations align with studies from Canada and New Zealand involving  
498 young active females, which also highlight the importance of flexibility, choice, inclusive  
499 sizing, comfortable materials, and styles designed for the female body.<sup>26 45</sup>

500 Future research is needed with pupils, parents, PE staff and senior school staff to further  
501 develop and refine these recommendations to ensure they are fit for purpose. The findings

502 also highlight a need to develop a national-level process by which schools can assess their  
503 current PE uniform policies, access evidence-based guidelines for improving comfort and  
504 inclusivity, and implement necessary changes. Once this is developed, it would be important  
505 to evaluate the impact on pupils' body satisfaction, self-confidence, and engagement in PE.

### 506 **Strengths and limitations**

507 By incorporating perspectives from both female pupils and PE staff and using activities to  
508 facilitate discussions, this qualitative methodology enabled us to explore beyond surface-  
509 level preferences for PE uniforms and understand in more depth how PE uniforms may  
510 influence girls' body image and PE engagement. However, challenges in recruiting secondary  
511 schools resulted in a less diverse sample than planned, particularly with limited  
512 representation from schools in more deprived areas and pupils from ethnic minority  
513 backgrounds. While our initial PE uniform policy recommendations were developed using  
514 the data, only perspectives from Year 8 girls and PE staff in six mixed-sex Academy schools  
515 were captured. Further research is required to ensure these recommendations are inclusive for  
516 all pupils, including those with different gender identities, Special Education Needs and  
517 Disabilities (SEND) and from ethnic minority backgrounds. Additionally, most girls in our  
518 sample reported high levels of PE enjoyment, highlighting the need to ensure future  
519 recommendations are suitable for girls with low PE engagement.

### 520 **CONCLUSION**

521 This qualitative study highlights the importance of having secondary school PE uniform  
522 policies that promote comfort and self-confidence among adolescent girls to facilitate better  
523 PE engagement. Our findings suggest it is important to balance offering pupils choice over  
524 PE uniform items to facilitate better comfort, whilst also maintaining uniformity to reduce  
525 social comparison and ensure items are appropriate for pupils of different gender identities.  
526 Girls who lack self-confidence may be more self-conscious about how they look in their PE  
527 uniform, which may reduce PE engagement. As well as offering unisex items, schools should  
528 consider offering a variety of styles and sizes without gender labels to ensure uniforms fit  
529 female bodies, as well as allowing pupils to wear their own bottoms and additional layer to  
530 help improve self-confidence.

Acknowledgments: We would like to thank the participants for taking part in the study. We would also like to thank PPIE members for their input into study development.

Conflicts of Interest: None

Ethical Approval Statement: The Faculty of Health Sciences Ethics Committee at the University of Bristol granted ethical approval (Reference number: 17624).

Data sharing: Anonymised transcripts will be made available on the University of Bristol Data Repository ([Accessing data in data.bris | Staff | University of Bristol](#)) under the restricted access data policy.

## REFERENCES

1. Viner RM, Ross D, Hardy R, et al. Life course epidemiology: recognising the importance of adolescence. *J Epidemiol Community Health* 2015;69(8):719-20. doi: 10.1136/jech-2014-205300 [published Online First: 20150202]
2. Albers PN, Widnall E, Hatch L, et al. Prevalence of mental health, well-being, and school connectedness by gender: results from the South West–school health research network pilot study: *J Epidemiology Community Health*, 2023:A133-A33.
3. Clay D, Vignoles VL, Dittmar H. Body image and self-esteem among adolescent girls: Testing the influence of sociocultural factors. *Journal of research on adolescence* 2005;15(4):451-77.
4. Choukas-Bradley S, Roberts SR, Maheux AJ, et al. The Perfect Storm: A Developmental-Sociocultural Framework for the Role of Social Media in Adolescent Girls' Body Image Concerns and Mental Health. *Clin Child Fam Psychol Rev* 2022;25(4):681-701. doi: 10.1007/s10567-022-00404-5 [published Online First: 20220716]
5. Troisi A. Body Image and Body Dissatisfaction. In: Troisi A, ed. *Bariatric Psychology and Psychiatry*. Cham: Springer International Publishing 2020:33-39.
6. Grogan S. *Body Image: Understanding Body Dissatisfaction in Men, Women and Children*. Routledge 2021
7. Bornioli A, Lewis-Smith H, Smith A, et al. Adolescent body dissatisfaction and disordered eating: Predictors of later risky health behaviours. *Soc Sci Med* 2019;238:112458. doi: 10.1016/j.socscimed.2019.112458 [published Online First: 20190807]
8. Bornioli A, Lewis-Smith H, Slater A, et al. Body dissatisfaction predicts the onset of depression among adolescent females and males: a prospective study. *J Epidemiol Community Health* 2020 doi: 10.1136/jech-2019-213033 [published Online First: 20201207]
9. Paxton SJ, Neumark-Sztainer D, Hannan PJ, et al. Body dissatisfaction prospectively predicts depressive mood and low self-esteem in adolescent girls and boys. *J Clin Child Adolesc Psychol* 2006;35(4):539-49. doi: 10.1207/s15374424jccp3504\_5
10. Vannucci A, Ohannessian CM. Body Image Dissatisfaction and Anxiety Trajectories During Adolescence. *J Clin Child Adolesc Psychol* 2018;47(5):785-95. doi: 10.1080/15374416.2017.1390755 [published Online First: 20171031]
11. Biddle SJ, Asare M. Physical activity and mental health in children and adolescents: a review of reviews. *Br J Sports Med* 2011;45(11):886-95. doi: 10.1136/bjsports-2011-090185 [published Online First: 20110801]

12. Schmalz DL, Deane GD, Birch LL, et al. A longitudinal assessment of the links between physical activity and self-esteem in early adolescent non-Hispanic females. *J Adolesc Health* 2007;41(6):559-65. doi: 10.1016/j.jadohealth.2007.07.001 [published Online First: 20070929]
13. Dumith SC, Gigante DP, Domingues MR, et al. Physical activity change during adolescence: a systematic review and a pooled analysis. *Int J Epidemiol* 2011;40(3):685-98. doi: 10.1093/ije/dyq272 [published Online First: 20110118]
14. Collings PJ, Wijndaele K, Corder K, et al. Levels and patterns of objectively-measured physical activity volume and intensity distribution in UK adolescents: the ROOTS study. *Int J Behav Nutr Phys Act* 2014;11:23. doi: 10.1186/1479-5868-11-23 [published Online First: 20140224]
15. Sport England. Active Lives Children and Young People Survey. Academic year 2022-23, 2023.
16. Dodd HF, Hesketh K. The British Preschool Children's Play Survey: When, Where, and How Adventurously Do British Preschool-Aged Children Play? *J Phys Act Health* 2024;21(11):1142-49. doi: 10.1123/jpah.2024-0155 [published Online First: 20241016]
17. Salway RA-O, de Vocht F, Emm-Collison L, et al. Comparison of children's physical activity profiles before and after COVID-19 lockdowns: A latent profile analysis. (1932-6203 (Electronic))
18. Jago RA-O, Salway R, House D, et al. Short and medium-term effects of the COVID-19 lockdowns on child and parent accelerometer-measured physical activity and sedentary time: a natural experiment. (1479-5868 (Electronic))
19. Jago RA-O, Salway R, Emm-Collison L, et al. Association of BMI category with change in children's physical activity between ages 6 and 11 years: a longitudinal study. (1476-5497 (Electronic))
20. Craike MJ, Symons C, Zimmerman JAM. Why do young women drop out of sport and physical activity? A social ecological approach. *Annals of leisure research* 2009;12(2):148-72.
21. Duffey K, Barbosa A, Whiting S, et al. Barriers and Facilitators of Physical Activity Participation in Adolescent Girls: A Systematic Review of Systematic Reviews. *Front Public Health* 2021;9:743935. doi: 10.3389/fpubh.2021.743935 [published Online First: 20211015]
22. Bailey R. Physical education and sport in schools: a review of benefits and outcomes. *J Sch Health* 2006;76(8):397-401. doi: 10.1111/j.1746-1561.2006.00132.x
23. Allender S, Cowburn G, Foster C. Understanding participation in sport and physical activity among children and adults: a review of qualitative studies. *Health Educ Res* 2006;21(6):826-35. doi: 10.1093/her/cyl063 [published Online First: 20060720]
24. Youth Sport Trust. PE and School Sport. The Annual Report 2024, 2024.
25. Mills CD, Cooling KE. The 'ideal' PE Kit to help reduce Body Image concerns within Adolescent Girls. *Obesity Weight Management and Therapy* 2019;2(1):1-8.
26. Change Our Game. The effects of sport uniform policy changes to girls and women 2022 [Available from: <https://changeourgame.vic.gov.au/insights/uniforms-that-encourage-girls-to-play-sport-and-be-physically-active> accessed 13th November 2024.
27. Elliott D, Hoyle K. An examination of barriers to physical education for Christian and Muslim girls attending comprehensive secondary schools in the UK. *European Physical Education Review* 2014;20(3):349-66.
28. Howard T. Practical, professional or patriarchal? An investigation into the socio-cultural impacts of gendered school sports uniform and the role uniform plays in shaping female experiences of school sport. *Sport, Education and Society* 2023:1-18.



29. UK Government. School uniform 2023 [Available from: School uniform - GOV.UK ([www.gov.uk](http://www.gov.uk)) accessed 18th Jan 2024.
30. Scottish Government. School uniform and clothing: Guidance for schools and education authorities 2024.
31. Welsh Government. School uniform and appearance: policy guidance for governing bodies (WG23-17), 2023.
32. Victoria State Government. Student Dress Code, 2024.
33. New Zealand Human Rights Commission. School uniform guidelines, 2022.
34. Jago R, Bailey R. Ethics and paediatric exercise science: issues and making a submission to a local ethics and research committee. (0264-0414 (Print))
35. O'Brien BC, Harris IB, Beckman TJ, et al. Standards for reporting qualitative research: a synthesis of recommendations. *Academic medicine* 2014;89(9):1245-51.
36. GOV.UK. Schools, pupils and their characteristics. Academic year 2023/24, 2024.
37. Clarke V, Braun V. Thematic analysis: a practical guide. London: Sage 2022.
38. QSR International Pty Ltd. NVivo Version 20.7.1534, 2023.
39. GOV.UK. GCSE results (Attainment 8) 2024 [Available from: <https://www.ethnicity-facts-figures.service.gov.uk/education-skills-and-training/11-to-16-years-old/gcse-results-attainment-8-for-children-aged-14-to-16-key-stage-4/latest/#:~:text=as%20a%20result,-.Data%20for%20the%202022%20to%202023%20school%20year%20shows%20that,girls%2C%20and%2044.0%20for%20boys> accessed 2 December 2024.
40. GOV.UK. List of ethnic groups 2022 [Available from: <https://www.ethnicity-facts-figures.service.gov.uk/style-guide/ethnic-groups/> accessed 2 December 2024.
41. Hilton JM, Devall EL. The Family Economic Strain Scale: Development and evaluation of the instrument with single-and two-parent families. *Journal of Family and Economic Issues* 1997;18:247-71.
42. Ryan M, Ricardo LIC, Nathan N, et al. Are school uniforms associated with gender inequalities in physical activity? A pooled analysis of population-level data from 135 countries/regions. *J Sport Health Sci* 2024;13(4):590-98. doi: 10.1016/j.jshs.2024.02.003 [published Online First: 20240215]
43. Norrish H, Farrington F, Bulsara M, et al. The effect of school uniform on incidental physical activity among 10-year-old children. *Asia-Pacific Journal of Health, Sport and Physical Education* 2012;3(1):51-63.
44. Nathan N, McCarthy N, Hope K, et al. The impact of school uniforms on primary school student's physical activity at school: outcomes of a cluster randomized controlled trial. *Int J Behav Nutr Phys Act* 2021;18(1):17. doi: 10.1186/s12966-021-01084-0 [published Online First: 20210123]
45. Koulanova A, Sabiston CM, Pila E, et al. Ideas for action: Exploring strategies to address body image concerns for adolescent girls involved in sport. *Psychology of Sport and Exercise* 2021;56:102017. doi: <https://doi.org/10.1016/j.psychsport.2021.102017>
46. Slater A, Tiggemann M. Gender differences in adolescent sport participation, teasing, self-objectification and body image concerns. *J Adolesc* 2011;34(3):455-63. doi: 10.1016/j.adolescence.2010.06.007 [published Online First: 20100731]
47. Thøgersen-Ntoumani C, Ntoumanis N, Cumming J, et al. Can self-esteem protect against the deleterious consequences of self-objectification for mood and body satisfaction in physically active female university students? *J Sport Exerc Psychol* 2011;33(2):289-307. doi: 10.1123/jsep.33.2.289
48. Vandenbosch L, Fardouly J, Tiggemann M. Social media and body image: Recent trends and future directions. *Current opinion in psychology* 2022;45:101289.

49. Rounsefell K, Gibson S, McLean S, et al. Social media, body image and food choices in healthy young adults: A mixed methods systematic review. *Nutrition & Dietetics* 2020;77(1):19-40.
50. Jiotsa B, Naccache B, Duval M, et al. Social media use and body image disorders: Association between frequency of comparing one's own physical appearance to that of people being followed on social media and body dissatisfaction and drive for thinness. *International journal of environmental research and public health* 2021;18(6):2880.
51. Vincente-Benito I, Ramírez-Durán MDV. Influence of social media use on body image and well-being among adolescents and Young adults: a systematic review. *Journal of psychosocial nursing and mental health services* 2023;61(12):11-18.
52. Holland G, Tiggemann M. A systematic review of the impact of the use of social networking sites on body image and disordered eating outcomes. *Body image* 2016;17:100-10.
53. Easton S, Morton K, Tappy Z, et al. Young people's experiences of viewing the fitspiration social media trend: Qualitative study. *Journal of medical Internet research* 2018;20(6):e219.
54. Hollett RC, Challis M. Experimental evidence that browsing for activewear lowers explicit body image attitudes and implicit self-esteem in women. *Body Image* 2023;46:383-94.
